1        **Judgments of other bias in Cochrane systematic reviews of interventions are highly**  
2        **inconsistent and thus hindering use and comparability of evidence**

3  
4            Andrija Babic<sup>1</sup>, Andela Pijuk<sup>2</sup>, Lucie Brázdilová<sup>3</sup>, Yuliyana Georgieva<sup>4</sup>,  
5            Marco António Raposo Pereira<sup>5</sup>, Tina Poklepovic<sup>2</sup>, Livia Puljak<sup>2,6\*</sup>

6  
7    Affiliations:

8    1. Institute of Emergency Medicine in Split-Dalmatia County, Split, Croatia

9    2. Cochrane Croatia, University of Split School of Medicine, Split, Croatia

10   3. Faculty of Medicine and Dentistry, Palacký University Olomouc, Olomouc, Czech  
11   Republic

12   4. Medical University of Plovdiv, Plovdiv, Bulgaria

13   5. Faculty of Health Sciences - University of Beira Interior, Covilhã, Portugal

14   6. Agency for Quality and Accreditation in Health Care and Social Welfare, Zagreb, Croatia

15  
16  
17  
18   \*Corresponding author:

19   Prof. Livia Puljak, MD, PhD

20   Phone: +385-21-557-807, Fax: +385-21-557-811, E-mail: [livia@mefst.hr](mailto:livia@mefst.hr)

21

22 **Abstract**

23 **Background:** Clinical decisions are made based on Cochrane systematic reviews (CSRs), but  
24 implementation of results of evidence syntheses such as CSRs is problematic if the evidence  
25 is not prepared consistently. All systematic reviews should assess risk of bias (RoB) in  
26 included studies, and in CSRs this is done by using Cochrane RoB tool. However, the tool is  
27 not necessarily applied according to the instructions. In this study we aimed to analyze types  
28 and judgments of ‘other bias’ in the RoB tool in CSRs of interventions.

29 **Methods:** We analyzed CSRs that included randomized controlled trials (RCTs) and  
30 extracted data regarding ‘other bias’ from the RoB table and accompanying support for the  
31 judgment. We categorized different types of other bias.

32 **Results:** We analyzed 768 CSRs that included 11369 RCTs. There were 602 (78%) CSRs that  
33 had ‘other bias’ domain in the RoB tool, and they included a total of 7811 RCTs. In the RoB  
34 table of 337 CSRs for at least one of the included trials it was indicated that no other bias was  
35 found and supporting explanations were inconsistently judged as low, unclear or high RoB. In  
36 the 524 CSRs that described various sources of other bias there were 5762 individual types of  
37 explanations which we categorized into 31 groups. The judgments of the same supporting  
38 explanations were highly inconsistent. Furthermore, we found numerous other inconsistencies  
39 in reporting of sources of other bias in CSRs.

40 **Conclusion:** Cochrane authors mention a wide range of sources of other bias in the RoB tool  
41 and they inconsistently judge the same supporting explanations. Inconsistency in appraising  
42 risk of other bias hinders reliability and comparability of Cochrane systematic reviews.  
43 Furthermore, discrepant and erroneous judgments of bias in evidence synthesis will inevitably  
44 hinder implementation of evidence in routine clinical practice and reduce confidence of  
45 practitioners in otherwise trustworthy sources of information.

46

47 **Keywords:** systematic review; Cochrane; risk of bias; other bias, inconsistency

48 **Running title:** Other bias in Cochrane reviews

49

## 50 **Introduction**

51 Assessment of the risk of bias (RoB) in included studies is an integral part of preparing  
52 Cochrane systematic reviews (CSRs). Bias is any systematic error that can negatively affect  
53 estimated effects of interventions and lead authors to wrong conclusions about efficacy and  
54 safety of analyzed interventions [1].

55 CSRs use Cochrane's RoB tool, whose aim is to enable better appraisal of evidence and  
56 ultimately lead to better healthcare [2]. Cochrane's standard RoB tool has seven domains, of  
57 which first six refer to specific potential biases while the seventh domain is called 'other  
58 bias', which is used for bias occurring due to any additional problems that were not covered  
59 elsewhere in the first six domains [3].

60 The Cochrane Handbook provides some examples of other potential threats to validity, such  
61 as design-specific risk of bias in non-randomized trials, baseline imbalance between groups of  
62 participants, blocked randomization in trials that are not blinded, differential diagnostic  
63 activity, study changes due to interim results, deviations from the study protocol, giving  
64 intervention before randomization, inappropriate administration of an intervention or having  
65 co-intervention(s), contamination due to drug pooling among participants, insufficient  
66 delivery of intervention, inappropriate inclusion criteria, using instruments that are not  
67 sensitive for specific outcomes, selective reporting of subgroups and fraud[3].

68 This list of potential other sources of bias mentioned in the Cochrane Handbook is limited,  
69 and it would therefore be useful to explore potential additional sources of 'other bias'. By  
70 consulting a more comprehensive list of potential other biases, systematic review might  
71 recognize certain problems in included studies that might not otherwise consider a potential  
72 source of bias.

- 73 The aim of this study was to analyze the scoring and support for judgment of the category
- 74 ‘other bias’ in a large number of interventional CSRs of randomized controlled trials (RCTs)
- 75 published in the Cochrane Database of Systematic Reviews (CDSR).

## 76 **Methods**

77 We conducted a retrospective analysis of published CSRs.

78

### 79 *Inclusion and exclusion criteria*

80 We retrieved CSRs of RCTs about interventions published from July 2015 to June 2016 (N =  
81 955) by using Advanced search in The Cochrane Library. Diagnostic CSRs, empty CSRs,  
82 overviews of systematic reviews and CSRs withdrawn in this period were excluded. CSRs  
83 that included both RCTs and non-randomized trials were included, but only RoB of RCTs was  
84 analyzed.

85

### 86 *Screening*

87 One author assessed all titles/abstracts to establish eligibility of CSRs for inclusion. Another  
88 author verified the assessments of the first author.

89

### 90 *Data extraction and categorization*

91 Data extraction table was developed and piloted using five CSRs. One author extracted the  
92 data and another author verified 10% of extractions. Of the 77 verified CSRs we found 3  
93 CSRs which were partially extracted (3.9%), which we consider to be a negligible percentage  
94 of discrepancy. We extracted judgments and supporting explanations for judgments from the  
95 other bias section of RoB table in CSRs. We also extracted judgments and support for  
96 judgments from additional non-standard domains beyond the seven standard RoB domains in  
97 RoB table if Cochrane authors used them. For CSRs that did not use the 'other bias' domain  
98 in the RoB table or any other additional non-standard domains, we analyzed text of results to

99 see whether Cochrane authors mentioned any potential sources of other bias in the text of the  
100 review only. Each supporting explanations for judgments of risk of bias in the analyzed trials  
101 was categorized by two authors (AB and LP), via consensus.

102

### 103 *Outcomes*

104 We analyzed number, type, judgments and inconsistencies for various comments about other  
105 risk of bias. We also analyzed characteristics of CSRs where there was no ‘other bias’ domain  
106 for any of the included RCTs, in terms of number and type of additional non-standard RoB  
107 domains that were used instead of ‘other bias’.

108

### 109 *Statistics*

110 We performed descriptive statistics using Microsoft Excel (Microsoft Inc., Redmond, WA,  
111 USA). We presented data as frequencies and percentages. In the primary analysis we  
112 presented CSRs that had the ‘other bias’ domain in the RoB table. In the secondary analysis  
113 we presented CSRs that did not have the ‘other bias’ domain, or had different non-standard  
114 variations of risk of bias assessment.

115

## 116 **Results**

117

### 118 *1. Primary analysis*

119 We analyzed 768 CSRs that included 11369 RCTs. Among those 768 CSRs, we included in  
120 the primary analysis 602 CSRs that had 'other bias' domain in the RoB tables. Those 602  
121 CSRs included a total of 7811 RCTs. We analyzed 166 CSRs in the secondary analysis  
122 because they either did not have 'other bias' domain in RoB tables (N=149), or those CSRs  
123 had both 'other bias' domain and additional non-standard domains in the RoB tables (N=17).

124 Out of 602 CSRs in the primary analysis, there were 524 (87%) CSRs that described various  
125 sources of bias in the 'other bias' domain, while in 78 (13%) CSRs not a single source of other  
126 bias was reported. Furthermore, among 602 CSRs from the primary analysis, there were 337  
127 (56%) CSRs in which at least one included trial indicated that no other bias was found.

128 Terminology for comments about non-existent other bias varied, even within individual  
129 CSRs. In 268 (80%) CSRs only one version of the comment that no other bias was found was  
130 used, while in 69 (20%) CSRs Cochrane authors used different expressions in comments to  
131 indicate that no other sources of bias were found.

132 In 40 (12%) out of 337 CSRs that indicated that no other bias was found, we observed  
133 discrepancies in judgment for this domain. Namely, Cochrane authors in these 40 CSRs  
134 sometimes indicated that lack of other bias was associated with low RoB, and sometimes they  
135 marked it as unclear or high RoB. In 59 (18%) of these 337 CSRs at least one support for  
136 judgment that indicated that no other bias was identified Cochrane authors judged as not  
137 being low risk of bias (either high or unclear); in 278 CSRs this was judged as low RoB.

138 In 19 CSRs all comments that referred to no other bias being identified were judged as  
139 unclear. In one CSR having no other bias was judged as both low and high. In one CSR the



140 same comment was judged in different RCTs as either low or high. In one CSR the same  
141 comment was judged in different RCTs as either low, or unclear or high.

142 Of the 7811 trials that were included in the 602 CSRs from the main analysis, in 3703 (47%)  
143 trials domain for other bias indicated in the support for judgment that other bias was not  
144 identified. Of those 3703 trials, there were 288 (7.8%) that were judged as unclear RoB, 4  
145 (0.1%) that were judged as high RoB, while the others (N=3411, 92.1%) were judged as low  
146 RoB.

147

#### 148 *Sources of other bias*

149 In the 524 analyzed CSRs that described various sources of other bias, there were 5762  
150 different supporting explanations for judgments of other bias that we categorized into 31  
151 categories. In 535 trials it was indicated only that it was not possible to assess other bias. For  
152 24 (4%) of those 535 trials it was not indicated why this was not possible, while the most  
153 common reasons for not being able to assess other bias were that there were ‘insufficient  
154 information’ (N=392, 73%), the trial was published as a conference abstract only (N=78,  
155 15%) and that the trial was published in foreign language so there were issues with translation  
156 (N=11, 2%). Cochrane authors were not consistent in judging this type of supporting  
157 explanation; for 11 (2%) trials it was judged as high RoB, for 520 (94%) as unclear RoB and  
158 for 4 (0.7%) as low RoB.

159 There were 236 trials for which Cochrane authors simply wrote that issues related to other  
160 bias were not described or unclear. This type of supporting explanation was also  
161 inconsistently judged by the Cochrane authors; 7 (3%) judged it as low RoB and 229 (97%) as  
162 unclear RoB.

163 The remaining 4991 explanations for judgments of other bias were divided into 29 categories  
164 that are shown in Table 1. The most frequently used categories of explanations for other bias  
165 were related to baseline characteristics of participants, funding of a trial, reporting, sample  
166 size and conflict of interest (Table 2). Cochrane authors used the domain for other bias to  
167 indicate positive, negative and unclear aspects of a trial. For example, three most common  
168 types of explanations in the category related to baseline characteristic of participants indicated  
169 that either baseline characteristics were similar, or that there was imbalance in baseline  
170 characteristics, or that there was insufficient information about it. Among 4991 explanations,  
171 we were unable to categorize 85 of them because they were uninformative, including  
172 explanations such as ‘Adequate’ or ‘N/A’ or ‘Other risk of bias was possible’. Finally, there  
173 were 112 explanations that were used only once or twice in RoB tables we analyzed so we  
174 categorized that group as ‘Other explanations’.

175

#### 176 *Partial studies included in the primary analysis*

177 We found 34 CSRs with specific partial data regarding other bias. We divided them into four  
178 distinct groups: first group with 28 CSRs that had judgments for 'other bias', but not all had  
179 accompanying comments, second group with 4 CSRs where only one included RCT did not  
180 have the ‘other bias’ domain, third group with one CSR with included RCT without ‘other  
181 bias’ domain and included RCT with only judgment without comment, and fourth group with  
182 one CSR where RoB table was completely missing for 6 included RCTs. Some CSRs had  
183 additional non-standard RoB domains, separately or in addition to the ‘other bias’ domain.  
184 Categories of additional non-standard RoB domains in CSRs are shown in Table 3.

185

#### 186 *Cochrane authors’ judgments of different explanations for ‘other bias’*

187 There were 3033 trials for which only one category of explanation was written by Cochrane  
188 authors. When the explanation had only one category of comment we could be certain that the  
189 judgment referred only to that specific comment so we analyzed those in detail to see how the  
190 Cochrane authors judge different explanatory comments. There were 259 types of different  
191 explanations among those 3033 trials. We analyzed in more detail those judgments for 20  
192 most common explanations of other bias and found very high inconsistency in how Cochrane  
193 authors judge the same explanations (Table 2).

194

## 195 *2. Secondary analysis*

### 196 *Reviews without 'other bias' domain in the RoB table*

197 Among 149 CSRs that did not have 'other bias' domain in the RoB table, there were 102  
198 CSRs that did not have any other replacement domain for 'other bias'. These 102 CSRs used  
199 varied number of standard RoB domains. In those 102 CSRs, number of standard RoB  
200 domains that were used varied, with one standard RoB domain in 4 CSRs, three RoB domains  
201 in 7 CSRs, four RoB domains in 15 CSRs, five domains in 51 CSRs and 6 domains in 25  
202 CSRs.

203 For this group of CSRs, that did not have the 'other bias' domain in the RoB table, we  
204 analyzed texts of results to see whether they mentioned any other sources of bias, beyond the  
205 standard six domains, in the section 'Risk of bias in included studies'. We found that 68/102  
206 (67%) did not mention any sources of other bias in the results of review. However, the  
207 remaining 34 (33%) did have comments about the other bias. Three of those 34 stated that  
208 they had not found any other risk of bias, while 31 CSRs out of those 34 reported in the text  
209 of results that the included studies had had from 1 to 6 different categories of other bias.

210

211 *Reviews with both ‘other bias’ domain and additional non-standard domain(s) for other bias*  
212 *in RoB tables*

213 Nine CSRs had both ‘other bias’ domain and additional non-standard domain(s) for other bias  
214 in RoB tables. Those CSRs used from 1 to 4 additional non-standard domains; 18 in total.  
215 Those additional non-standard RoB domains are listed in Table 3 and marked with asterisk.

216

217 *Reviews without ‘other bias’ domain but with additional non-standard domain(s)*

218 There were 57 CSRs that did not have the ‘other bias’ domain, but they did have additional  
219 non-standard RoB domains apart from the standard domains in the Cochrane RoB table. Most  
220 of the CSRs had only one additional non-standard domain (N=24), while others had 2-8  
221 additional domains per each RCT. Table 3 shows non-standard domains that were used in  
222 those CSRs without ‘other bias’ domain.

223

224 *Reviews that consistently did not use support for judgment or they used non-standard*  
225 *judgments*

226 We found 9 CSRs that consistently did not use supporting explanations for judgment or they  
227 used non-standard judgments. In 5 CSRs authors used judgments low, high or unclear RoB,  
228 but without comments as support for judgment. In one CSR all trials were marked with  
229 unclear risk of other bias without any comment as support for judgment. In four CSRs all  
230 trials were marked with low risk of other bias without any comment as support for judgment.

231 We also found 4 CSRs that did not have judgments low-high-unclear, but different kinds of  
232 judgments. One CSR had judgments yes/no without supporting comments; two CSRs had  
233 judgments yes, no or unclear, with supporting comments and there was one CSR with  
234 judgments A-adequate and B-unclear.



## 236 **Discussion**

237 In this study we analyzed 768 Cochrane systematic reviews, with 11369 included trials. We  
238 found that Cochrane authors used numerous different categories of sources of other bias and  
239 that they were not judging them consistently. We categorized different types of supporting  
240 explanations into 31 categories, and we found numerous other inconsistencies in reporting of  
241 sources of other bias in CSRs. Findings of this study are disconcerting because consistency in  
242 secondary research is very important to ensure comparability of studies.

243 Insufficient and unclear reporting of the ‘other bias’ domain was very common in the CSRs  
244 we analyzed. Among the most common support for judgment were comments that we  
245 categorized as ‘not described/unclear’, which is puzzling because ‘other bias’ domain is not  
246 specific like the other six domains of the RoB tool, and it is therefore difficult to fathom what  
247 it means that other bias was not described or that it was unclear. If the authors did not find  
248 sources of other bias, or if they thought that they could not assess other bias because of  
249 brevity of report or language issues, they should have stated that. Likewise, for some trials the  
250 only supporting explanation was that other bias was ‘Adequate’. Without any further  
251 explanations, readers cannot know what exactly the Cochrane authors found to be adequate in  
252 terms of other potential sources of bias. Many systematic reviews had a high number of  
253 included studies, and therefore some comments were repeated multiple times in the same  
254 systematic review.

255 The most commonly used specific category of other bias referred to baseline characteristics of  
256 participants. In RCTs randomization should ensure allocation of participants into groups that  
257 differ only in intervention they received. Randomization should ensure that characteristics of  
258 participants that may influence the outcome will be distributed equally across trial arms so  
259 that any difference in outcomes can be assumed to be a consequence of intervention  
260 [4]. Baseline imbalances between the groups may indicate that there was something wrong

261 with the randomization process, or that they might be due to chance [5]. Severe baseline  
262 imbalances can occur because of deliberate actions of trialists if they aim to intentionally  
263 subvert the randomization process [6] or due to unintentional errors.

264 Chance imbalances should not be considered a source of bias, but it may be difficult to  
265 distinguish whether baseline imbalances are caused by chance or intentional actions. If there  
266 are multiple studies included in a meta-analysis, it could be expected that chance imbalances  
267 will act in opposite directions. But the problem may occur if there is a pattern of imbalances  
268 across several trials that may favor one intervention over another, suggesting imbalance due  
269 to bias and not due to chance [7]. Cochrane is now developing a second generation of the RoB  
270 tool, titled RoB 2.0, and one of the signaling questions in the RoB domain about  
271 randomization process asks “Were there baseline imbalances that suggest a problem with the  
272 randomization process” [7]. The fact that so many Cochrane authors used comments about  
273 baseline imbalance as a domain of other bias, and not in the RoB domain about random  
274 sequence generation (selection bias) indicate that many Cochrane authors consider that this  
275 aspect should be emphasized separately from the selection bias domain.

276 The second most commonly used category of supporting explanations was related to funding  
277 of a trial, and comments about conflicts of interest were the fifth most common category. This  
278 is in direct contrast with the recommendations from the Cochrane Handbook, where it is  
279 acknowledged that information about vested interests should be collected and presented when  
280 relevant, but not in the RoB table; such information should be reported in the table called  
281 ‘Characteristics of included studies’ [8]. RoB table should be used to describe specific  
282 methodological aspects that may have been influenced by the vested interest and directly lead  
283 to RoB [8]. Therefore, it is obvious that the authors of the Cochrane Handbook assume that  
284 the influence of sponsors can be mediated via other domains of RoB tool such as selective  
285 reporting of favorable outcomes.

286 However, Lundh et al. have published a CSR in 2017 about industry sponsorship and research  
287 outcomes, in which they included 75 primary studies, which shows that commercial funding  
288 leads to more favorable efficacy results and conclusions compared to non-profit funding [9].  
289 They concluded that industry sponsorship introduces bias that cannot be explained by  
290 standard domains of Cochrane's RoB assessment [9]. The debate about whether funding  
291 presents source of bias or not is ongoing in the Cochrane, with some considering that  
292 commercial funding is a clear risk of bias, while others argue against such standpoint[10, 11].  
293 This debate apparently reflects the current situation in which many Cochrane authors continue  
294 to use funding and conflict of interest as a source of other bias despite the official warning  
295 against such use of information about sponsorship from the Cochrane Handbook, as we have  
296 demonstrated in this study.

297 The third most frequent category of supporting explanations for other bias was related to poor  
298 reporting, where Cochrane authors indicated that relevant information were missing or were  
299 inadequately reported. Poor reporting hinders transparency, as it allows authors to avoid  
300 attention to weak aspects of their studies. For this reason reporting guidelines should be used  
301 [12].

302 Comments about sample size were the fourth most common category either in a sense that the  
303 trial did or did not report sample size calculation, or that sample size was "small" without any  
304 further explanation of what the Cochrane authors considered to be a small sample. There were  
305 21 trials for which Cochrane authors wrote that there were fewer than 50 participants in each  
306 arm. It is unclear where this cut-off is coming from, as there is no such guidance in the  
307 Cochrane Handbook in the chapter about risk of bias. On the contrary, chapter 8.15.2. of the  
308 Cochrane Handbook specifically warns that "sample size or use of a sample size (or power)  
309 calculation" are examples of quality indicators that „should not be assessed within this  
310 domain“[8].



311 The Cochrane Handbook also warns that authors should avoid double-counting, by not  
312 including potential sources of bias in the 'other bias' domain if they can be more appropriately  
313 covered by other domains in the tool [8]. As can be seen by our study, Cochrane authors  
314 sometimes do double-counting because there were categories of comments supporting  
315 judgments that could have been addressed in the first six domains.

316 As we have shown, most of Cochrane authors decided to use the other bias domain to describe  
317 potential additional biases that were not covered in the first six domains of the RoB tool. In  
318 the proposed RoB tool 2.0 there is no 'other bias' domain [7]. The proposed RoB tool is much  
319 more complex, compared to the current version of the RoB tool, and many items that were  
320 specifically emphasized by Cochrane authors in the other bias domain, as shown in our study,  
321 are addressed in the RoB 2.0 tool. However, there are still potential biases from other sources  
322 that the RoB 2.0 may neglect by omitting the RoB domain, such as biases specific to certain  
323 topics, and those that were not recognized by the RoB 2.0 tool in advance.

324 We have already conducted a similar analysis of Cochrane RoB domain related to attrition  
325 bias, and we found that judgments and supports for judgments in that domain were extremely  
326 inconsistent in CSRs (unpublished data). This analysis related to sources of other bias in  
327 CSRs contributes to the perception that Cochrane RoB tool is inconsistently used among  
328 Cochrane authors. The authors do not necessarily follow guidance from the Cochrane  
329 Handbook. In the support for judgment they mention issues that the Cochrane Handbook  
330 explicitly warns against. Various comments that serve as supports for judgments were  
331 inconsistently judged across CSRs and trials included in CSRs. Cochrane authors also use  
332 inconsistent terminology to describe the same concepts. Increasing complexity of the RoB  
333 tool, as proposed in the RoB tool 2.0 will likely only increase this problem of insufficient  
334 consistency in RoB appraisal and worsen this problem of insufficient comparability of  
335 judgments of RoB across CSRs.

336 Furthermore, our study indicated that Cochrane authors extensively use the available option to  
337 customize the RoB table. We found that there were as many as 102 (13%) out of 768 analyzed  
338 CSRs that did not use the other bias domain in the RoB table at all. CSRs are produced using  
339 software Review Manager (RevMan). As soon as an author inserts a new study in the  
340 RevMan among included studies, an empty RoB table for the study automatically appears,  
341 with seven pre-determined domains. Therefore, Cochrane authors need to intentionally  
342 remove or add some domains if they want to customize the RoB table. Among 102 CSRs that  
343 did not have other bias domain, 33% of those CSRs had comments about other potential  
344 sources of bias in the body of the manuscript. It is unclear why some Cochrane authors use  
345 only text for comments about other bias instead of using RoB table for this purpose.  
346 Additionally, we observed that in many CSRs without other bias domain there were other  
347 customizations of the RoB table, which had from one to six other, standard RoB domains  
348 included. Exactly half of those CSRs without other bias domain in the RoB table had less than  
349 six standard domains in the RoB table.

350 Limitation of our study is a limited number of analyzed CSRs that were published in 2015 and  
351 2016. However, considering the number of CSRs analyzed, and the amount of inconsistency  
352 we observed, we have no reason to suspect that the results would be significantly different if a  
353 more recent cohort of published CSRs would have been used. Additionally, it takes a long  
354 time to categorize thousands of different inconsistent supporting explanations. Some  
355 unintentional errors in categorizations may have been made.

356

357 **Conclusion**

358 Cochrane authors mention a wide range of sources of other bias in the RoB tool and they  
359 inconsistently judge the same supporting explanations. Inconsistency in appraising risk of  
360 other bias hinders reliability and comparability of Cochrane systematic reviews. Discrepant  
361 and erroneous judgments of bias in evidence synthesis will inevitably hinder implementation  
362 of evidence in routine clinical practice and reduce confidence of practitioners in otherwise  
363 trustworthy sources of information. Potential remedies include more attention to author  
364 training, better resources for Cochrane authors, better peer-review and editorial consistency in  
365 the production of Cochrane systematic reviews.

366

367 **Declarations**

368 *Ethics approval and consent to participate*

369 Not applicable; this was secondary study

370

371 *Consent for publication*

372 Not applicable

373

374 *Availability of data and material*

375 The datasets used and/or analysed during the current study are available from the

376 corresponding author on reasonable request.

377

378 *Competing interests*

379 The authors declare that they have no competing interests.

380

381 *Funding*

382 No extramural funding.

383

384 *Authors' contributions*

385 Study design: LP. Data analysis and interpretation: AB, AP, LB, YG, MARP, TPP, LP.

386 Drafting the first version of the manuscript: AB, LP. Revisions of the manuscript: AB, AP,

387 LB, YG, MARP, TPP, LP. All authors read and approved the final manuscript. All authors

388 agree to be accountable for this work.

389

390 *Acknowledgements*

391 We are grateful to Ms. Dalibora Behmen for language editing.

392 **References**

- 393 1. Gluud LL: Bias in clinical intervention research. *Am J Epidemiol* 2006, 163(6):493-  
394 501.
- 395 2. Higgins JP, Altman DG, Gotzsche PC, Juni P, Moher D, Oxman AD, Savovic J,  
396 Schulz KF, Weeks L, Sterne JA: The Cochrane Collaboration's tool for assessing risk  
397 of bias in randomised trials. *BMJ* 2011, 343:d5928.
- 398 3. Higgins JPT, Green Se: Cochrane Handbook for Systematic Reviews of Interventions  
399 Version 5.1.0 [updated March 2011]. The Cochrane Collaboration. Available from  
400 [www.cochrane-handbook.org](http://www.cochrane-handbook.org). In.; 2011.
- 401 4. Roberts C, Torgerson DJ: Understanding controlled trials - Baseline imbalance in  
402 randomised controlled trials. *Br Med J* 1999, 319(7203):185-185.
- 403 5. Fu R, Vandermeer BW, Shamliyan TA, O'Neil ME, Yazdi F, Fox SH: AHRQ  
404 Methods for Effective Health Care: Handling Continuous Outcomes in Quantitative  
405 Synthesis. Methods Guide for Effectiveness and Comparative Effectiveness Reviews.  
406 Rockville (MD): Agency for Healthcare Research and Quality (US). 2008.
- 407 6. Schulz KF: Subverting Randomization in Controlled Trials. *Jama-J Am Med Assoc*  
408 1995, 274(18):1456-1458.
- 409 7. A revised tool to assess risk of bias in randomized trials (RoB 2.0). Available at:  
410 <https://sites.google.com/site/riskofbiastool/welcome/rob-2-0-tool>.
- 411 8. Higgins J: Chapter 8: assessing risk of bias in included studies. In: Higgins J, Green S,  
412 editors. Cochrane Handbook for Systematic Reviews of Interventions Version 510  
413 (updated March 2011), The Cochrane Collaboration; 2011 [Available from  
414 [www.cochrane-handbook.org](http://www.cochrane-handbook.org)]. Last accessed: February 17, 2015. 2011.
- 415 9. Lundh A, Lexchin J, Mintzes B, Schroll JB, Bero L: Industry sponsorship and  
416 research outcome. *Cochrane Database Syst Rev* 2017, 2:MR000033.

- 417 10. Bero LA: Why the Cochrane Risk of Bias Tool Should Include Funding Source as a  
418 Standard Item. *Cochrane Database of Systematic Reviews* 2013(12).
- 419 11. Sterne JAC: Why the Cochrane Risk of Bias Tool Should Not Include Funding Source  
420 as a Standard Item. *Cochrane Database of Systematic Reviews* 2013(12).
- 421 12. Schulz KF, Altman DG, Moher D: CONSORT 2010 Statement: updated guidelines for  
422 reporting parallel group randomised trials. *Bmc Med* 2010, 8:18.

423

424

425



427 **Table 1. Different categories of other bias (based on 4991 explanations) in Cochrane**  
 428 **systematic reviews**

| Category                                 | N (%)       |
|------------------------------------------|-------------|
| Baseline characteristics of participants | 1067 (21.4) |
| Funding                                  | 774 (15.6)  |
| Sample size                              | 405 (8.1)   |
| Reporting                                | 381 (7.6)   |
| Conflict of interest                     | 288 (5.8)   |
| Inclusion and exclusion criteria         | 197 (3.9)   |
| Confounding                              | 196 (3.9)   |
| Analyses                                 | 191 (3.8)   |
| Outcome domains and outcome measures     | 135 (2.7)   |
| Co-interventions                         | 134 (2.7)   |
| Deviations from the protocol             | 123 (2.5)   |
| Randomisation                            | 111 (2.2)   |
| Terminated early                         | 108 (2.2)   |
| Issues related to cross-over trials      | 98 (2)      |
| Intention-to-treat analysis (ITT)        | 95 (1.9)    |
| Study design                             | 76 (1.6)    |
| Compliance                               | 72 (1.4)    |
| Attrition                                | 71 (1.4)    |
| Contamination                            | 65 (1.3)    |
| Follow-up and study duration             | 46 (0.9)    |
| Blinding                                 | 25 (0.5)    |
| Clustering                               | 17 (0.3)    |
| Selection bias                           | 17 (0.3)    |
| Protocol registration                    | 16 (0.3)    |
| Study quality                            | 9 (0.2)     |
| Publication bias                         | 7 (0.1)     |
| Adequacy of comparators                  | 5 (0.1)     |
| Inexplicable                             | 85 (1.7)    |
| Other                                    | 177 (3.6)   |

429  
 430



431 **Table 2. Judgments for the 20 most common explanations of other bias**

| <b>Explanation</b>                                                 | <b>Total</b> | <b>High, N (%); n*</b> | <b>Unclear, N (%); n*</b> | <b>Low, N (%); n*</b> |
|--------------------------------------------------------------------|--------------|------------------------|---------------------------|-----------------------|
| Not possible to assess other bias                                  | 504          | 7 (1.4);7              | 494 (98);117              | 3 (0.6);3             |
| Baseline characteristics similar between the groups                | 314          | 0 (0);0                | 24 (8);13                 | 290 (92);61           |
| Not described/unclear                                              | 233          | 0 (0);0                | 226 (97);54               | 7 (3);4               |
| Baseline imbalance between groups of participants                  | 167          | 91 (54);56             | 62 (37);41                | 14 (9);12             |
| Funding: industry                                                  | 162          | 83 (51);28             | 77 (48);25                | 2 (1);2               |
| Potential confounding factors                                      | 120          | 63 (53);38             | 47 (39);34                | 10 (8);9              |
| Not enough information on baseline characteristics of participants | 88           | 8 (9);6                | 78 (89);39                | 2 (2);2               |
| Funding: non-profit                                                | 86           | 0 (0);0                | 4 (5);4                   | 82 (95);33            |
| Funding: not reported                                              | 72           | 0 (0);0                | 68 (94);15                | 4 (6);4               |
| Important parameters not reported                                  | 61           | 19 (31);14             | 41 (68);28                | 1 (1);1               |
| Sample size: calculation of sample size not provided               | 42           | 24 (57);6              | 17 (41);7                 | 1 (2);1               |
| Potential randomisation problem                                    | 40           | 9 (23);9               | 28 (70);13                | 3 (7);3               |
| Potential problem with inclusion criteria                          | 40           | 16 (40);15             | 22 (55);12                | 2 (5);2               |
| Deviations from the study protocol                                 | 37           | 16 (43)<br>13          | 18 (49)<br>15             | 3 (8)<br>3            |
| No relevant subgroup analysis                                      | 36           | 10 (28);1              | 26 (72);1                 | 0 (0);0               |
| Funding: intervention supplied by industry                         | 32           | 14 (44);7              | 12 (38);10                | 6 (18);3              |
| Adequate                                                           | 28           | 0 (0);0                | 0 (0);0                   | 28 (100);1            |
| No information on the validity of the outcome measure              | 27           | 3 (11);3               | 23 (85);5                 | 1 (4);1               |
| Sample size: performed calculation                                 | 24           | 1 (4);1                | 3 (12);3                  | 20 (84);9             |
| Sample size: small                                                 | 23           | 8 (35);5               | 15 (65);5                 | 0 (0);0               |

432 \*n= Number of SRs that included at least one RCT with this characteristic

433

434 **Table 3. Categories of additional non-standard RoB domains in Cochrane systematic**  
 435 **reviews**

| <b>Additional category</b>                                       | <b>N of CSRs</b> |
|------------------------------------------------------------------|------------------|
| Group similarity at baseline (selection bias)                    | 11               |
| Baseline data                                                    | 5                |
| Baseline outcome measures (similar)                              | 3                |
| Groups balanced at baseline/ balance in baseline characteristics | 2                |
| Baseline characteristics of participants                         | 1                |
| Baseline comparability of treatment and control groups           | 1                |
| Baseline measures                                                | 1                |
| Similarity of baseline characteristics*                          | 1                |
| Treatment/control groups comparative at entry                    | 1                |
| Major imbalance in important baseline confounders                | 1                |
| Comparability of groups on different prognostic characteristics* | 1                |
| Size                                                             | 8                |
| Size of the study                                                | 5                |
| Small sample size bias                                           | 4                |
| Sample size*                                                     | 2                |
| Sufficient sample size*                                          | 1                |
| Power calculation*                                               | 1                |
| Timing of outcome assessment (similar)*                          | 10               |
| Adequate follow-up                                               | 2                |
| Study duration                                                   | 2                |
| Early stopping                                                   | 1                |
| Groups received comparable treatment                             | 2                |
| Care program identical/ identical care                           | 2                |
| Treatment fidelity*                                              | 1                |
| Free of systematic differences in care?*                         | 1                |
| Consistency in intervention delivery                             | 1                |
| Equality of treatment                                            | 1                |
| Protocol deviation balanced                                      | 1                |
| Groups received same intervention                                | 1                |
| Compliance/adherence assessed (acceptable)                       | 7                |
| Compliance with recommendation reliable?                         | 1                |
| Compliance acceptable*                                           | 1                |
| Source of funding/ sponsorship                                   | 4                |
| For profit funding*                                              | 1                |
| Funding*                                                         | 1                |
| Vested interest bias                                             | 1                |
| Conflict of interest                                             | 1                |
| Co-intervention avoided or similar*                              | 5                |
| Co-interventions                                                 | 2                |
| Groups received same co- interventions                           | 1                |
| Intention to treat                                               | 5                |
| Incorrect analysis                                               | 1                |
| Results based on data dredging?                                  | 1                |
| Analyses adjust for different lengths of follow-up workers?      | 1                |
| Appropriate statistical tests use?                               | 1                |

|                                                                       |   |
|-----------------------------------------------------------------------|---|
| Adequate adjustment for confounding in the analyses?                  | 1 |
| Contamination/ protection against contamination                       | 3 |
| Validity of outcome measures                                          | 1 |
| Reliability of outcome measures                                       | 1 |
| Outcome measures used valid and reliable?                             | 1 |
| Free from performance bias                                            | 1 |
| Performance bias as «differential expertise» bias                     | 1 |
| Performance bias as comparability in the experience of care providers | 1 |
| Adequate patient description                                          | 1 |
| Recruitment of participants from the same population?                 | 1 |
| Recruitment of participants over the same study period?               | 1 |
| Washout/ carry-over effect in cross-over study designs                | 2 |
| Overall assessment of bias risk                                       | 1 |
| Summary of risk of bias for Consumption outcome                       | 1 |
| Researcher allegiance*                                                | 1 |
| Therapist allegiance*                                                 | 1 |
| CHBG (Cochrane hepato-biliary group) combined assessment (mortality)* | 1 |
| CHBG combined assessment (hepatic encephalopathy)*                    | 1 |
| Comparability with individually randomized trials                     | 1 |
| Detection bias (biochemical validation of smoking outcomes)           | 1 |
| Ethical approval                                                      | 1 |
| Explicit inclusion/exclusion criteria                                 | 1 |
| Free of dietary differences other than fat?*                          | 1 |
| Loss of clusters                                                      | 1 |
| Methods for selecting cases to adjudicate                             | 1 |
| Outcome description                                                   | 1 |
| Publication format                                                    | 1 |
| Recruitment bias                                                      | 1 |

436 \*domains found in 9 Cochrane reviews that had both 'other bias' domain and additional non-  
437 standard domain(s) for other bias in RoB tables
